# Supplementary material for: Real-time assessment of mitochondrial DNA heteroplasmy dynamics at the single-cell level
Source: PubMed Central journal article supplement (PMC11574196; doi:10.1038/s44318-024-00183-5), 2024-08-05
Supplement: 44318_2024_183_MOESM2_ESM.pdf [file 44318_2024_183_MOESM2_ESM.pdf]

# Real-time assessment of mitochondrial DNA heteroplasmy dynamics at the single-cell level

Rodaria Roussou, Dirk Metzler, Francesco Padovani, Felix Thoma, Rebecca Schwarz, Boris Shraiman, Kurt Schmoller, and Christof Osman

*Corresponding author(s): Christof Osman (osman@bio.lmu.de)*

---

## Review Timeline:

|                     |             |
|---------------------|-------------|
| Submission Date:    | 7th Mar 24  |
| Editorial Decision: | 8th Apr 24  |
| Revision Received:  | 7th Jun 24  |
| Accepted:           | 17th Jul 24 |

---

*Editor: Hartmut Vodermaier*

## Transaction Report:

(Note: With the exception of the correction of typographical or spelling errors that could be a source of ambiguity, letters and reports are not edited. Depending on transfer agreements, referee reports obtained elsewhere may or may not be included in this compilation. Referee reports are anonymous unless the Referee chooses to sign their reports.)

Prof. Christof Osman  
Ludwig-Maximilians-Universitaet Muenchen  
Faculty of Biology  
Grosshaderner Str. 2  
Planegg-Martinsried, Bayern 82152  
Germany

8th Apr 2024

Re: EMBOJ-2024-117200  
Real-time assessment of mitochondrial DNA heteroplasmy dynamics at the single-cell level

Dear Christof,

Thank you again for submitting your study on single-cell monitoring of mtDNA heteroplasmy dynamics to The EMBO Journal. I have now heard back from three expert referees, who had agreed to review the manuscript. As you will see, the reviewers appreciate your approaches and the importance of the question. At the same time, they all feel that the study would be considerably stronger if the new system would have been exploited to obtain deeper new insights into mtDNA inheritance/segregation beyond confirming previously suggested mechanisms. This is most explicitly stated in the major concern of referee 1, the general comment of referee 2, as well as in the more specific queries raised by referee 3.

Should you be able to deepen this aspect of the work, and to satisfactorily address the various specific/minor points listed in the reports, we would be happy to consider an adequately revised manuscript further for publication. Since our single-major-revision-round policy makes it important to diligently respond to each referee point at the time of resubmission, I would however encourage you to contact me with a preliminary point-by-point response already during the early stages of your revision work, in order to clarify how key issues may be addressed and to discuss possible revision plans (happily via Zoom if needed). We would also be open to extension of the default three-months revision period if needed; our 'scooping protection' (meaning that competing work appearing elsewhere in the meantime will not affect our considerations of your study) would of course remain valid also throughout such an extension.

Detailed information on preparing, formatting and uploading a revised manuscript can be found below and in our Guide to Authors. Thank you again for the opportunity to consider this work for The EMBO Journal, and I look forward to hearing from you in due time.

With kind regards,

Hartmut

Hartmut Vodermaier, PhD  
Senior Editor, The EMBO Journal  
h.vodermaier@embojournal.org

\*\*\* PLEASE NOTE: All revised manuscript are subject to initial checks for completeness and adherence to our formatting guidelines. Revisions may be returned to the authors and delayed in their editorial re-evaluation if they fail to comply to the following requirements (see also our Guide to Authors for further information):

1) Every manuscript requires a Data Availability section (even if only stating that no deposited datasets are included). Primary datasets or computer code produced in the current study have to be deposited in appropriate public repositories prior to resubmission, and reviewer access details provided in case that public access is not yet allowed. Further information: [embopress.org/page/journal/14602075/authorguide#dataavailability](https://embopress.org/page/journal/14602075/authorguide#dataavailability)

2) Each figure legend must specify

- size of the scale bars that are mandatory for all micrograph panels
- the statistical test used to generate error bars and P-values
- the type error bars (e.g., S.E.M., S.D.)
- the number (n) and nature (biological or technical replicate) of independent experiments underlying each data point
- Figures may not include error bars for experiments with  $n < 3$ ; scatter plots showing individual data points should be used instead.

3) Revised manuscript text (including main tables, and figure legends for main and EV figures) has to be submitted as editable text file (e.g., .docx format). We encourage highlighting of changes (e.g., via text color) for the referees' reference.

4) Each main and each Expanded View (EV) figure should be uploaded as individual production-quality files (preferably in .eps, .tif, .jpg formats). For suggestions on figure preparation/layout, please refer to our Figure Preparation Guidelines: <http://bit.ly/EMBOPressFigurePreparationGuideline>

5) Point-by-point response letters should include the original referee comments in full together with your detailed responses to them (and to specific editor requests if applicable), and also be uploaded as editable (e.g., .docx) text files.

6) Please complete our Author Checklist, and make sure that information entered into the checklist is also reflected in the manuscript; the checklist will be available to readers as part of the Review Process File. A download link is found at the top of our Guide to Authors: [embopress.org/page/journal/14602075/authorguide](http://embopress.org/page/journal/14602075/authorguide)

7) All authors listed as (co-)corresponding need to deposit, in their respective author profiles in our submission system, a unique ORCID identifier linked to their name. Please see our Guide to Authors for detailed instructions.

8) Please note that supplementary information at EMBO Press has been superseded by the 'Expanded View' for inclusion of additional figures, tables, movies or datasets; with up to five EV Figures being typeset and directly accessible in the HTML version of the article. For details and guidance, please refer to: [embopress.org/page/journal/14602075/authorguide#expandedview](http://embopress.org/page/journal/14602075/authorguide#expandedview)

9) Digital image enhancement is acceptable practice, as long as it accurately represents the original data and conforms to community standards. If a figure has been subjected to significant electronic manipulation, this must be clearly noted in the figure legend and/or the 'Materials and Methods' section. The editors reserve the right to request original versions of figures and the original images that were used to assemble the figure. Finally, we generally encourage uploading of numerical as well as gel/blot image source data; for details see: [embopress.org/page/journal/14602075/authorguide#sourcedata](http://embopress.org/page/journal/14602075/authorguide#sourcedata)

At EMBO Press, we ask authors to provide source data for the main manuscript figures. Our source data coordinator will contact you to discuss which figure panels we would need source data for and will also provide you with helpful tips on how to upload and organize the files.

Further information is available in our Guide For Authors:

<https://www.embopress.org/page/journal/14602075/authorguide>

In the interest of ensuring the conceptual advance provided by the work, we recommend submitting a revision within 3 months (7th Jul 2024). Please discuss the revision progress ahead of this time with the editor if you require more time to complete the revisions. Use the link below to submit your revision:

Link Not Available

-----  
Referee #1:

In this elegant manuscript, Roussou et al explore how heteroplasmy changes across generations in yeast lineages. Taking advantage of heteroplasmic yeast strains expressing differentially mitochondrially-encoded fluorescent proteins, they find that asymmetric partitioning of mtDNA during cell division drives mtDNA variant segregation. This study is of the highest rigor and will be of interest to a broad readership.

My one major comment has to do with further experimentally testing the main conclusion of the manuscript, viz. that the transmission of a limited number of mtDNA copies is a major driver for the progressive divergence of heteroplasmic states in a proliferating yeast population. I wonder if this conclusion could be further empirically tested for example by increasing copy number (TFAM overexpression) and determining if this reduces the rate of variant segregation. I don't think this experiment is absolutely necessary, but a further testing of their main finding would potentially strengthen the manuscript.

I have no other major comments. This manuscript was a pleasure to read and, I believe, a strong candidate for the EMBO J.

Minor Comments

- Should page 6 line 3 be 8 hours, not 6 hours?

- Using the mtLacO-LacI system they determine ~11 nucleoids migrate from mother to daughter. Assuming one genome per nucleoid, what can be inferred about the contribution of shuffling due to fission fusion cycles based on the author's modelling?

Referee #2:

In this study, Roussou et al have developed a novel approach which allows them to follow fluorescently labeled mtDNA variants in heteroplasmic yeast populations over several generations and with single-cell resolution. They show that mtDNA variant segregation is driven by asymmetric partitioning of mtDNA copies during cell division. Using computational modeling they conclude that these segregation kinetics are further influenced by mitochondrial fission and fusion.

The method and modeling developed for this manuscript represents a powerful method to investigate mtDNA inheritance. They could confirm previously suggested mechanisms about mtDNA variant segregation and the role of mitochondrial fission and fusion in this process. While these are important findings, the authors could have used this approach to explore further aspects of mtDNA inheritance, such as tracking the dynamics of mutated versus wildtype mtDNA. This would in my view significantly increase novelty and the impact of the study.

Major concerns:

1. From the description in the main text and methods section it is not clear if/how the authors have validated the automated tracking of cell over multiple generations. Where at least some of the data also manually annotated and resulted in the same lineage tree?
2. What is visualized is actually not the mtDNA itself, but rather the expressed protein (and its redistribution to the progenies). Although the authors perform experiments to show that the decay time for both Atp6-NG and Atp6-mKaede2 are similar, the half-life time seems to be in the range of hours. Therefore the loss of heteroplasmy might be significantly underestimated. Could this be corrected for in their model?
3. It is not clear to me why the wildtype mtDNA-Atp6-NG strain increases fluorescence over time, which the authors attribute to the switch in media, while the wildtype mtDNA-Atp6mKaede2 does not show this increase upon media switch (and even display a decrease in signal)?
4. When estimating the percentage of hetero- and homoplasmic populations (Fig. 3), autofluorescence in the "absent" channel is given as a potential explanation. It is surprising that such high levels of autofluorescence appear in healthy cells. I would suggest to compare the levels measured with wildtype yeast, which do not express any fluorescent protein, to verify if equally high levels of autofluorescence are measured.
5. Regarding the effect of fission and fusion on mtDNA inheritance, it has been shown previously, that mitochondrial fission is also linked with mtDNA replication. Is this accounted for in the model (and if not, why do the authors think it is neglectable)?

Referee #3:

mtDNA are present in multiple copies in a single cell. These can vary in sequence due to accumulation of mutations, resulting in heteroplasmy. The degree of heteroplasmy and the transition towards homoplasmy can have effects on mitochondrial function (dependent on the nature of the mtDNA mutations). The lack of available tools to visualize variant mtDNA copies within single cells has challenged the ability to track heteroplasmic mtDNA segregation dynamics. In this study, Roussou et al., use differently-labelled mitochondrial genomes to track mtDNA segregation and heteroplasmy in live cells. They first make homoplasmic ATP6 gene tagged with either mneongreen or mkate2. They then generate a heteroplasmic zygote expressing both variants together and track via live cell imaging the segregation of mkate2 and mneongreen across 6 generations of growth. They find that there is variation in the degree of heteroplasmy as cells divide, and over time cells move towards homoplasmy (with either mneongreen or mkate2 alone). They develop a model for these dynamics. They suggest a role for mitochondrial fission-fusion combined with asymmetric segregation of mtDNA between mother and daughter in mtDNA segregation.

Overall, the study is very interesting and provides insights into outstanding and important question in the field. The tool developed to track mtDNA in single cells is powerful and has significant future applications. I have a few comments/ suggestions that should further strengthen the manuscript:

1. Is there mixing of mtDNA variants? The transition from heteroplasmy to homoplasmy in the population is rapid. Given this timeframe, it is possible that the fluorescence is free diffusing across the network, but the mtDNA (nucleoid) variants in the zygote do not mix. Authors should assess whether there is mixing, or if the mtDNA (nucleoids) remain spatially segregated.
2. If there is no DNA mixing, is the present experimental setup truly reflective of heteroplasmy (as one would expect in physiological conditions)? A scenario where there is no mtDNA mixing could also result population transition towards homoplasmy, as at each division, cells would predominantly inherit only one of the two DNA variants.
3. Following on the above comment, does the model assume that there is mixing between the mtDNA variants in the zygote?

How would the segregation dynamics play out in a scenario where this did not occur?

4. The section on asymmetric partitioning needs further explanation/ analysis: For the asymmetric partitioning model to apply, daughter cells would have to inherit a fixed amount of mitochondria and mtDNA from the mother cell, early during bud formation. After this, as the daughter cell grows, mitochondria and mtDNA would have to be synthesized in the daughter cell. It is not so clear whether this is indeed the case, or that transmission of mitochondria and mtDNA occurs through the growth period of the bud up until division. Could the authors clarify this, and provide support for the scenario they are favouring? Authors should provide quantification of the number of nucleoids and cell area for mother and daughter cells at the time of division (when daughter and mother cell sizes should be comparable), and the number of nucleoids across cell area for mother and daughter cells from birth till division.

Minor point:

Page 6, second paragraph line 6: the figure reference appears to be incorrect.

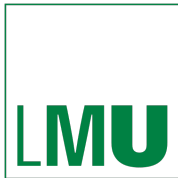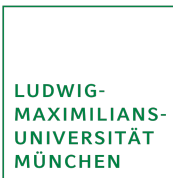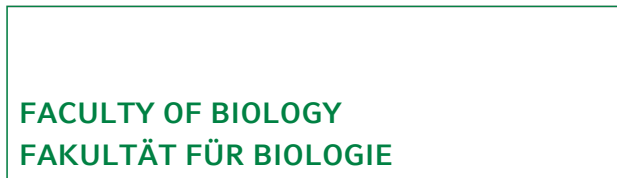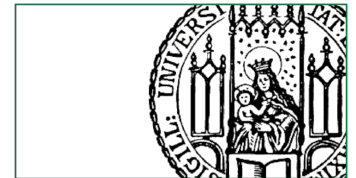

Prof. Dr. Christof Osman · Großhaderner Str. 2 · 82131 Planegg-Martinsried

**Prof. Dr. Christof Osman**

**Dr. Hartmut Vodermaier**

Ludwig-Maximilians-Universität  
Biocenter of the LMU  
Großhaderner Str. 2  
82152 Planegg-Martinsried

☎ (+49) 89-2180-74756

✉ osman@bio.lmu.de

June 6, 2024

## Response to reviewer comments regarding our manuscript entitled: 'Real-time assessment of mitochondrial DNA heteroplasmy dynamics at the single-cell level'

Dear Hartmut,

We are delighted to receive positive feedback on our manuscript titled "Real-time assessment of mitochondrial DNA heteroplasmy dynamics at the single-cell level". We appreciate the time and effort you and the reviewers have dedicated to evaluating our submission. We are grateful for the comments and we believe that our additional work inspired by the comments has greatly improved the manuscript. Most importantly, we have included several new experiments to provide more insight into the biology that underlies mtDNA variant segregation. The most important additions are the following:

- We have experimentally assessed the impact of mitochondrial fission on mtDNA variant segregation. In line with predictions derived from our simulations, we find that deletion of the gene *DNM1* results in faster segregation of mtDNA variants.
- We have included a computational and experimental assessment of the impact of higher mtDNA copy number on the segregation of mtDNA variants. We find that a strain with increased mtDNA copy number exhibits a slower segregation of mtDNA variants. We discuss this finding in light of predictions made by our simulations.
- We demonstrate that our experimental pipeline can also be used to examine segregation of WT and mutant mtDNA by observing purifying selection against mutant mtDNA.

### Reviewer #1:

*My one major comment has to do with further experimentally testing the main conclusion of the manuscript, viz. that the transmission of a limited number of mtDNA copies is a major driver for*

*the progressive divergence of heteroplasmic states in a proliferating yeast population. I wonder if this conclusion could be further empirically tested for example by increasing copy number (TFAM overexpression) and determining if this reduces the rate of variant segregation. I don't think this experiment is absolutely necessary, but a further testing of their main finding would potentially strengthen the manuscript.*

We are happy to hear that the reviewer liked our manuscript and are grateful for the suggestion of an experiment to test whether increasing mtDNA copy number reduces the rate of variant segregation. In our revised manuscript, we have examined the effect of increased mtDNA copy number on mtDNA variant segregation by simulations and also experimentally by examining segregation in cells lacking the gene *MRX6*, which was previously shown to exhibit a twofold increase of mtDNA copy number (Göke et al., MBoC, 2020). As hypothesized by the reviewer, we indeed see a reduced rate of variant segregation in  $\Delta mrx6$  cells. Based on predictions made by our simulations, we discuss that the reduced rate of variant segregation is caused by a higher percentage of mtDNA copies passed on to daughter cells, an increased mitochondrial fusion and fission frequency or a combination of both. The results are now presented in Fig. 5G and S10.

#### *Minor Comments*

*Should page 6 line 3 be 8 hours, not 6 hours?*

This has been corrected.

*Using the mtLacO-LacI system they determine 11 nucleoids migrate from mother to daughter. Assuming one genome per nucleoid, what can be inferred about the contribution of shuffling due to fission fusion cycles based on the author's modelling?*

According to our simulations, the  $ndau=11$  and  $nspl=5$  combination would best match the experimentally determined rate of variant segregation. We now mention this number in the text. However, as stated in the discussion, the exact amount of fission events predicted by our model should be treated carefully, as our simplistic model does not take into account parameters such as the branched nature of the mitochondrial network, nor a link between mtDNA replication and fission, which likely influence the speed of segregation.

Furthermore, we have now included experiments (Fig. 5G and S13) to assess the contribution of fission and fusion on the rate of mtDNA variant segregation. As predicted by our model, a lack of mitochondrial fission in  $\Delta dnm1$  cells results in faster variant segregation, most likely due to decreased shuffling.

#### **Reviewer #2:**

*... While these are important findings, the authors could have used this approach to explore further aspects of mtDNA inheritance, such as tracking the dynamics of mutated versus wildtype mtDNA. This would in my view significantly increase novelty and the impact of the study.*

To increase the novelty of our manuscript we have applied our experimental setup to examine the role of mitochondrial fission and the impact of increased mtDNA copy number on mtDNA variant

segregation. Our experiments demonstrate that absence of mitochondrial fission accelerates, whereas increased mtDNA copy number delays mtDNA variant segregation (Fig. 5G, S10). Additionally, we now demonstrate that our approach also allows assessment of mtDNA variant segregation in a setting where intact mtDNA competes against mutant mtDNA. In these experiments, we observe purifying selection against mutant mtDNA lacking the *COB* gene. We believe that these experiments greatly enhance the impact of our study.

*1. From the description in the main text and methods section it is not clear if/how the authors have validated the automated tracking of cell over multiple generations. Where at least some of the data also manually annotated and resulted in the same lineage tree?*

The automated tracking was always manually checked and corrected, if necessary. We have added a clarifying sentence in the method section.

*2. What is visualized is actually not the mtDNA itself, but rather the expressed protein (and its redistribution to the progenies). Although the authors perform experiments to show that the decay time for both Atp6-NG and Atp6-mKate2 are similar, the half-life time seems to be in the range of hours. Therefore the loss of heteroplasmy might be significantly underestimated. Could this be corrected for in their model?*

We thank the reviewer for this suggestion. Currently, the model is based on 0s and 1s that represent mtDNA copies. As pointed out by the reviewer, in the experiments fluorescently tagged Atp6 is used as a proxy for mtDNA itself. To account for this in the model, parameters such as mtDNA expression and protein stability would need to be introduced. Furthermore, it has been proposed that mitochondrial biogenesis occurs to different extents in the mother and the daughter cell (Rafelski et al., Science, 2012), and it is therefore unclear if existing proteins are distributed equally between mother and daughter. It will be interesting to further develop the mathematical model. However, we feel that the introduction of more parameters would complicate the model at this point. We, however, emphasize the point that we likely underestimate the rate of variant segregation in the revised version of the manuscript.

*3. It is not clear to me why the wildtype mtDNA-Atp6-NG strain increases fluorescence over time, which the authors attribute to the switch in media, while the wildtype mtDNA-Atp6mKate2 does not show this increase upon media switch (and even display a decrease in signal)?*

We agree that this finding is unexpected. Unfortunately, we currently cannot pinpoint the cause for this effect. We assume that this effect is caused by the switch from rich to minimal medium, which may affect mtDNA expression and the biophysical properties of the fluorescent proteins, as well as differences in the maturation time between NG and mKate2. However, this difference does not affect the quantification of heteroplasmy in our experiments, since NG and mKate2 fluorescence is normalized to the median fluorescence intensity per timeframe of the respective channel, in all our segregation experiments. We emphasize this point in the revised manuscript. We feel that determining the precise cause for the difference in Atp6-NG or Atp6-mKate2 over time would not add significant new insight.

*4. When estimating the percentage of hetero- and homoplasmic populations (Fig. 3), autofluorescence in the "absent" channel is given as a potential explanation. It is surprising that such high levels of*



*autofluorescence appear in healthy cells. I would suggest to compare the levels measured with wildtype yeast, which do not express any fluorescent protein, to verify if equally high levels of autofluorescence are measured.*

To address this reviewer's comment, we have assessed 'green' or 'red' fluorescence signal, representing background and/or bleed-through signal, in haploid cells exclusively expressing Atp6-mKate2 or Atp6-NG, respectively. We were able to perform these measurements on the timelapse images that we used to record segregation of mtDNA variants in heteroplasmic populations, since non-mated haploid cells were occasionally present in the field-of-view. The h-values determined for such cells is comparable to diploid cells, which we had classified as homoplasmic. Data representing these results are now shown in Fig. S7.

*5. Regarding the effect of fission and fusion on mtDNA inheritance, it has been shown previously, that mitochondrial fission is also linked with mtDNA replication. Is this accounted for in the model (and if not, why do the authors think it is neglectable)?*

We thank the reviewer for raising this point. Unfortunately, incorporating into the model that there is a bias for a mitochondrial fission event in-between replicated mtDNA copies would have required extensive re-writing of the code underlying our simulations, which was not feasible given our available resources and time constraints. We now acknowledge in the manuscript that we do not consider a link between mtDNA replication and fission instances. We aim to further refine the model in future studies to take into account further parameters, such as the relationship between mtDNA replication and fission and the branched nature of the mitochondrial network.

### **Reviewer #3:**

*1. Is there mixing of mtDNA variants? The transition from heteroplasmy to homoplasmy in the population is rapid. Given this timeframe, it is possible that the fluorescence is free diffusing across the network, but the mtDNA (nucleoid) variants in the zygote do not mix. Authors should assess whether there is mixing, or if the mtDNA (nucleoids) remain spatially segregated.*

We thank the reviewer for this comment. We have now provided more information on this matter in the revised version of the manuscript. On one hand we refer to previous work which has established that medial buds receive mtDNA from both parental strains (Strausberg and Perlman, Mol Gen Genet., 1978), while lateral buds inherit predominantly only one mtDNA variant from the parental cell from which the bud emerges. On the other hand, we also provide an analysis, where we determine h-values in medial and lateral buds (Fig. S6A) and an analysis of segregation kinetics, where all data derived from lateral buds are excluded (Fig. S6B). Importantly, excluding the lateral buds does not dramatically change the segregation kinetics compared to the dataset including the lateral buds.

*2. If there is no DNA mixing, is the present experimental setup truly reflective of heteroplasmy (as one would expect in physiological conditions)? A scenario where there is no mtDNA mixing could also result population transition towards homoplasmy, as at each division, cells would predominantly inherit only one of the two DNA variants.*

Please refer to response to previous comment.

*3. Following on the above comment, does the model assume that there is mixing between the mtDNA variants in the zygote? How would the segregation dynamics play out in a scenario where this did not occur?*

In our initial manuscript, we had included simulations, where segregation starts from arrays where mtDNA variants are semi-mixed (000111000111...) or alternating (0101010...). To address the reviewer's comment, in the revised version of the manuscript we included an additional simulation that starts from a non-mixed condition (00000.....11111). As apparent in Fig. S9, the predicted segregation pattern does not drastically change.

*4. The section on asymmetric partitioning needs further explanation/ analysis: For the asymmetric partitioning model to apply, daughter cells would have to inherit a fixed amount of mitochondria and mtDNA from the mother cell, early during bud formation. After this, as the daughter cell grows, mitochondria and mtDNA would have to be synthesized in the daughter cell. It is not so clear whether this is indeed the case, or that transmission of mitochondria and mtDNA occurs through the growth period of the bud up until division. Could the authors clarify this, and provide support for the scenario they are favouring? Authors should provide quantification of the number of nucleoids and cell area for mother and daughter cells at the time of division (when daughter and mother cell sizes should be comparable), and the number of nucleoids across cell area for mother and daughter cells from birth till division.*

As requested by the reviewer, we have quantified mtDNA spots using the mtLacO-LacI system over the duration of a whole cell cycle with a live-cell imaging experiment. Indeed we see that the foci number drops during the first 45 minutes in the mother cell, during which we observe mitochondrial content exchange between mother and daughter cell. After 45 minutes, we find that the mtDNA foci number increases in daughter cells, indicating that mtDNA is being newly synthesized in the growing daughter cell. In contrast, no further reduction of mtDNA copy number is seen in the mother cell after 45 minutes. The figure representing these data is now presented as Fig. S12.

Best regards,

Christof and Ria

Dear Dr. Osman,

Thank you again for submitting your revised manuscript for our consideration. Based on the positive re-reviews (below) of the three original referees, we have now accepted it for publication in The EMBO Journal.

Your manuscript will be processed for publication by EMBO Press. It will be copy edited and you will receive page proofs prior to publication. Please note that you will be contacted by Springer Nature Author Services to complete licensing and payment information.

You may qualify for financial assistance for your publication charges - either via a Springer Nature fully open access agreement or an EMBO initiative. Check your eligibility: <https://www.embopress.org/page/journal/14602075/authorguide#chargesguide>

Should you be planning a Press Release on your article, please get in contact with [embo\\_production@springernature.com](mailto:embo_production@springernature.com) as early as possible in order to coordinate publication and release dates.

If you have any questions, please do not hesitate to contact the Editorial Office. Thank you for your contribution to The EMBO Journal.

Yours sincerely,

Hartmut Vodermaier, PhD  
Senior Editor, The EMBO Journal  
[h.vodermaier@embojournal.org](mailto:h.vodermaier@embojournal.org)

-----  
Referee #1:

The authors have addressed all my comments.

Referee #2:

The authors have address all points raised or provided a sufficient explanation on why certain factors could not be included into their model.

Referee #3:

Authors have address my queries satisfactorily. I congratulate them on this excellent work.

>>> Please note that it is The EMBO Journal policy for the transcript of the editorial process (containing referee reports and your response letter) to be published as an online supplement to each paper. If you do NOT want this, you will need to inform the Editorial Office via email immediately. More information is available here: [https://www.embopress.org/transparent-process#Review\\_Process](https://www.embopress.org/transparent-process#Review_Process)

\*\* Click here to be directed to your login page: <https://emboj.msubmit.net>

## EMBO Press Author Checklist

|                                           |
|-------------------------------------------|
| Corresponding Author Name: Christof Osman |
| Journal Submitted to: EMBO J              |
| Manuscript Number: EMBOJ-2024-117200R     |

### USEFUL LINKS FOR COMPLETING THIS FORM

- [The EMBO Journal - Author Guidelines](#)
- [EMBO Reports - Author Guidelines](#)
- [Molecular Systems Biology - Author Guidelines](#)
- [EMBO Molecular Medicine - Author Guidelines](#)

### Reporting Checklist for Life Science Articles (updated January)

This checklist is adapted from Materials Design Analysis Reporting (MDAR) Checklist for Authors. MDAR establishes a minimum set of requirements in transparent reporting in the life sciences (see Statement of Task: [10.31222/osf.io/9sm4x](https://doi.org/10.31222/osf.io/9sm4x)). Please follow the journal's guidelines in preparing your article. **Please note that a copy of this checklist will be published alongside your article.**

#### Abridged guidelines for figures

##### 1. Data

The data shown in figures should satisfy the following conditions:

- the data were obtained and processed according to the field's best practice and are presented to reflect the results of the experiments in an accurate and unbiased manner.
- ideally, figure panels should include only measurements that are directly comparable to each other and obtained with the same assay.
- plots include clearly labeled error bars for independent experiments and sample sizes. Unless justified, error bars should not be shown for technical replicates.
- if  $n < 5$ , the individual data points from each experiment should be plotted. Any statistical test employed should be justified.
- Source Data should be included to report the data underlying figures according to the guidelines set out in the authorship guidelines on Data

##### 2. Captions

Each figure caption should contain the following information, for each panel where they are relevant:

- a specification of the experimental system investigated (eg cell line, species name).
- the assay(s) and method(s) used to carry out the reported observations and measurements.
- an explicit mention of the biological and chemical entity(ies) that are being measured.
- an explicit mention of the biological and chemical entity(ies) that are altered/varied/perturbed in a controlled manner.
- the exact sample size (n) for each experimental group/condition, given as a number, not a range;
- a description of the sample collection allowing the reader to understand whether the samples represent technical or biological replicates (including how many animals, litters, cultures, etc.).
- a statement of how many times the experiment shown was independently replicated in the laboratory.
- definitions of statistical methods and measures:
  - common tests, such as t-test (please specify whether paired vs. unpaired), simple  $\chi^2$  tests, Wilcoxon and Mann-Whitney tests, can be unambiguously identified by name only, but more complex techniques should be described in the methods section;
  - are tests one-sided or two-sided?
  - are there adjustments for multiple comparisons?
  - exact statistical test results, e.g., P values = x but not P values < x;
  - definition of 'center values' as median or average;
  - definition of error bars as s.d. or s.e.m.

**Please complete ALL of the questions below.  
Select "Not Applicable" only when the requested information is not relevant for your study.**

#### Materials

| <b>Newly Created Materials</b>                                                                                                                                                                                              | <b>Information included in the manuscript?</b> | <b>In which section is the information available?</b><br>(Reagents and Tools Table, Materials and Methods, Figures, Data Availability Section) |
|-----------------------------------------------------------------------------------------------------------------------------------------------------------------------------------------------------------------------------|------------------------------------------------|------------------------------------------------------------------------------------------------------------------------------------------------|
| New materials and reagents need to be available; do any restrictions apply?                                                                                                                                                 | Not Applicable                                 |                                                                                                                                                |
| <b>Antibodies</b>                                                                                                                                                                                                           | <b>Information included in the manuscript?</b> | <b>In which section is the information available?</b><br>(Reagents and Tools Table, Materials and Methods, Figures, Data Availability Section) |
| For <b>antibodies</b> provide the following information:<br>- Commercial antibodies: RRID (if possible) or supplier name, catalogue number and or/clone number<br>- Non-commercial: RRID or citation                        | Not Applicable                                 |                                                                                                                                                |
| <b>DNA and RNA sequences</b>                                                                                                                                                                                                | <b>Information included in the manuscript?</b> | <b>In which section is the information available?</b><br>(Reagents and Tools Table, Materials and Methods, Figures, Data Availability Section) |
| <b>Short novel DNA or RNA including primers, probes:</b> provide the sequences.                                                                                                                                             | Yes                                            | Appendix Table S2                                                                                                                              |
| <b>Cell materials</b>                                                                                                                                                                                                       | <b>Information included in the manuscript?</b> | <b>In which section is the information available?</b><br>(Reagents and Tools Table, Materials and Methods, Figures, Data Availability Section) |
| <b>Cell lines:</b> Provide species information, strain. Provide accession number in repository <b>OR</b> supplier name, catalog number, clone number, and <b>OR</b> RRID.                                                   | Not Applicable                                 |                                                                                                                                                |
| <b>Primary cultures:</b> Provide species, strain, sex of origin, genetic modification status.                                                                                                                               | Not Applicable                                 |                                                                                                                                                |
| Report if the cell lines were recently <b>authenticated</b> (e.g., by STR profiling) and tested for mycoplasma contamination.                                                                                               | Not Applicable                                 |                                                                                                                                                |
| <b>Experimental animals</b>                                                                                                                                                                                                 | <b>Information included in the manuscript?</b> | <b>In which section is the information available?</b><br>(Reagents and Tools Table, Materials and Methods, Figures, Data Availability Section) |
| <b>Laboratory animals or Model organisms:</b> Provide species, strain, sex, age, genetic modification status. Provide accession number in repository <b>OR</b> supplier name, catalog number, clone number, <b>OR</b> RRID. | Not Applicable                                 |                                                                                                                                                |
| <b>Animal observed in or captured from the field:</b> Provide species, sex, and age where possible.                                                                                                                         | Not Applicable                                 |                                                                                                                                                |
| Please detail <b>housing and husbandry conditions</b> .                                                                                                                                                                     | Not Applicable                                 |                                                                                                                                                |
| <b>Plants and microbes</b>                                                                                                                                                                                                  | <b>Information included in the manuscript?</b> | <b>In which section is the information available?</b><br>(Reagents and Tools Table, Materials and Methods, Figures, Data Availability Section) |
| <b>Plants:</b> provide species and strain, ecotype and cultivar where relevant, unique accession number if available, and source (including location for collected wild specimens).                                         | Not Applicable                                 |                                                                                                                                                |
| <b>Microbes:</b> provide species and strain, unique accession number if available, and source.                                                                                                                              | Yes                                            | Appendix Table S1                                                                                                                              |
| <b>Human research participants</b>                                                                                                                                                                                          | <b>Information included in the manuscript?</b> | <b>In which section is the information available?</b><br>(Reagents and Tools Table, Materials and Methods, Figures, Data Availability Section) |
| If collected and within the bounds of privacy constraints report on age, sex and gender or ethnicity for all study participants.                                                                                            | Not Applicable                                 |                                                                                                                                                |
| <b>Core facilities</b>                                                                                                                                                                                                      | <b>Information included in the manuscript?</b> | <b>In which section is the information available?</b><br>(Reagents and Tools Table, Materials and Methods, Figures, Data Availability Section) |
| If your work benefited from core facilities, was their service mentioned in the acknowledgments section?                                                                                                                    | Not Applicable                                 |                                                                                                                                                |

#### Design

| <b>Study protocol</b>                                                                                                                                                    | <b>Information included in the manuscript?</b> | <b>In which section is the information available?</b><br>(Reagents and Tools Table, Materials and Methods, Figures, Data Availability Section) |
|--------------------------------------------------------------------------------------------------------------------------------------------------------------------------|------------------------------------------------|------------------------------------------------------------------------------------------------------------------------------------------------|
| If study protocol has been <b>pre-registered</b> , provide DOI in the <b>manuscript</b> . For clinical trials, provide the trial registration number <b>OR</b> cite DOI. | Not Applicable                                 |                                                                                                                                                |
| Report the <b>clinical trial registration number</b> (at ClinicalTrials.gov or equivalent), where applicable.                                                            | Not Applicable                                 |                                                                                                                                                |

| <b>Laboratory protocol</b>                                                                              | <b>Information included in the manuscript?</b> | <b>In which section is the information available?</b><br>(Reagents and Tools Table, Materials and Methods, Figures, Data Availability Section) |
|---------------------------------------------------------------------------------------------------------|------------------------------------------------|------------------------------------------------------------------------------------------------------------------------------------------------|
| Provide DOI OR other citation details if <b>external detailed step-by-step protocols</b> are available. | Not Applicable                                 |                                                                                                                                                |

| <b>Experimental study design and statistics</b>                                                                                                                                                                                                                                                                                            | <b>Information included in the manuscript?</b> | <b>In which section is the information available?</b><br>(Reagents and Tools Table, Materials and Methods, Figures, Data Availability Section) |
|--------------------------------------------------------------------------------------------------------------------------------------------------------------------------------------------------------------------------------------------------------------------------------------------------------------------------------------------|------------------------------------------------|------------------------------------------------------------------------------------------------------------------------------------------------|
| Include a statement about <b>sample size</b> estimate even if no statistical methods were used.                                                                                                                                                                                                                                            | Yes                                            | Material and Methods, Figures                                                                                                                  |
| Were any steps taken to minimize the effects of subjective bias when allocating animals/samples to treatment (e.g. <b>randomization procedure</b> )? If yes, have they been described?                                                                                                                                                     | Not Applicable                                 |                                                                                                                                                |
| Include a statement about <b>blinding</b> even if no blinding was done.                                                                                                                                                                                                                                                                    | Not Applicable                                 |                                                                                                                                                |
| Describe <b>inclusion/exclusion criteria</b> if samples or animals were excluded from the analysis. Were the criteria pre-established?                                                                                                                                                                                                     | Not Applicable                                 |                                                                                                                                                |
| If sample or data points were omitted from analysis, report if this was due to <b>attrition or intentional exclusion</b> and provide justification.                                                                                                                                                                                        |                                                |                                                                                                                                                |
| For every figure, are <b>statistical tests</b> justified as appropriate? Do the data meet the assumptions of the tests (e.g., normal distribution)? Describe any methods used to assess it. Is there an estimate of variation within each group of data? Is the variance similar between the groups that are being statistically compared? | Yes                                            | Methods                                                                                                                                        |

| <b>Sample definition and in-laboratory replication</b>                                           | <b>Information included in the manuscript?</b> | <b>In which section is the information available?</b><br>(Reagents and Tools Table, Materials and Methods, Figures, Data Availability Section) |
|--------------------------------------------------------------------------------------------------|------------------------------------------------|------------------------------------------------------------------------------------------------------------------------------------------------|
| In the figure legends: state number of times the experiment was <b>replicated</b> in laboratory. | Yes                                            | Figures, Figure legends                                                                                                                        |
| In the figure legends: define whether data describe <b>technical or biological replicates</b> .  | Yes                                            | Figure legends                                                                                                                                 |

#### Ethics

| <b>Ethics</b>                                                                                                                                                                                                                                                                                            | <b>Information included in the manuscript?</b> | <b>In which section is the information available?</b><br>(Reagents and Tools Table, Materials and Methods, Figures, Data Availability Section) |
|----------------------------------------------------------------------------------------------------------------------------------------------------------------------------------------------------------------------------------------------------------------------------------------------------------|------------------------------------------------|------------------------------------------------------------------------------------------------------------------------------------------------|
| Studies involving <b>human participants</b> : State details of <b>authority granting ethics approval</b> (IRB or equivalent committee(s), provide reference number for approval).                                                                                                                        | Not Applicable                                 |                                                                                                                                                |
| Studies involving <b>human participants</b> : Include a statement confirming that <b>informed consent</b> was obtained from all subjects and that the experiments conformed to the principles set out in the WMA Declaration of Helsinki and the Department of Health and Human Services Belmont Report. | Not Applicable                                 |                                                                                                                                                |
| Studies involving <b>human participants</b> : For publication of <b>patient photos</b> , include a statement confirming that consent to publish was obtained.                                                                                                                                            | Not Applicable                                 |                                                                                                                                                |
| Studies involving experimental <b>animals</b> : State details of <b>authority granting ethics approval</b> (IRB or equivalent committee(s), provide reference number for approval. Include a statement of compliance with ethical regulations.                                                           | Not Applicable                                 |                                                                                                                                                |
| Studies involving <b>specimen and field samples</b> : State if relevant <b>permits</b> obtained, provide details of authority approving study; if none were required, explain why.                                                                                                                       | Not Applicable                                 |                                                                                                                                                |

| <b>Dual Use Research of Concern (DURC)</b>                                                                                                                                                                                                          | <b>Information included in the manuscript?</b> | <b>In which section is the information available?</b><br>(Reagents and Tools Table, Materials and Methods, Figures, Data Availability Section) |
|-----------------------------------------------------------------------------------------------------------------------------------------------------------------------------------------------------------------------------------------------------|------------------------------------------------|------------------------------------------------------------------------------------------------------------------------------------------------|
| Could your study fall under dual use research restrictions? Please check biosecurity documents and list of <b>select agents and toxins</b> (CDC): <a href="https://www.selectagents.gov/sat/list.htm">https://www.selectagents.gov/sat/list.htm</a> | Not Applicable                                 |                                                                                                                                                |
| If you used a select agent, is the security level of the lab appropriate and reported in the manuscript?                                                                                                                                            | Not Applicable                                 |                                                                                                                                                |
| If a study is subject to dual use research of concern regulations, is the name of the <b>authority granting approval and reference number</b> for the regulatory approval provided in the manuscript?                                               | Not Applicable                                 |                                                                                                                                                |

#### Reporting

The MDAR framework recommends adoption of discipline-specific guidelines, established and endorsed through community initiatives. Journals have their own policy about requiring specific guidelines and recommendations to complement MDAR.

| <b>Adherence to community standards</b>                                                                                                                                                                                                                                                                                              | <b>Information included in the manuscript?</b> | <b>In which section is the information available?</b><br>(Reagents and Tools Table, Materials and Methods, Figures, Data Availability Section) |
|--------------------------------------------------------------------------------------------------------------------------------------------------------------------------------------------------------------------------------------------------------------------------------------------------------------------------------------|------------------------------------------------|------------------------------------------------------------------------------------------------------------------------------------------------|
| State if relevant guidelines or checklists (e.g., <b>ICMJE, MIBBI, ARRIVE, PRISMA</b> ) have been followed or provided.                                                                                                                                                                                                              | Not Applicable                                 |                                                                                                                                                |
| For <b>tumor marker prognostic studies</b> , we recommend that you follow the <b>REMARK</b> reporting guidelines (see link list at top right). See author guidelines, under 'Reporting Guidelines'. Please confirm you have followed these guidelines.                                                                               | Not Applicable                                 |                                                                                                                                                |
| For <b>phase II and III randomized controlled trials</b> , please refer to the <b>CONSORT</b> flow diagram (see link list at top right) and submit the <b>CONSORT</b> checklist (see link list at top right) with your submission. See author guidelines, under 'Reporting Guidelines'. Please confirm you have submitted this list. | Not Applicable                                 |                                                                                                                                                |

#### Data Availability

| <b>Data availability</b>                                                                                                                                                                          | <b>Information included in the manuscript?</b> | <b>In which section is the information available?</b><br>(Reagents and Tools Table, Materials and Methods, Figures, Data Availability Section) |
|---------------------------------------------------------------------------------------------------------------------------------------------------------------------------------------------------|------------------------------------------------|------------------------------------------------------------------------------------------------------------------------------------------------|
| Have <b>primary datasets</b> been deposited according to the journal's guidelines (see 'Data Deposition' section) and the respective accession numbers provided in the Data Availability Section? | Yes                                            | Scripts and code has been deposited on a Github repository                                                                                     |
| Were <b>human clinical and genomic datasets</b> deposited in a public access-controlled repository in accordance to ethical obligations to the patients and to the applicable consent agreement?  | Not Applicable                                 |                                                                                                                                                |
| Are <b>computational models</b> that are central and integral to a study available without restrictions in a machine-readable form? Were the relevant accession numbers or links provided?        | Yes                                            | Scripts and code has been deposited on a Github repository                                                                                     |
| If publicly available data were reused, provide the respective <b>data citations in the reference list</b> .                                                                                      | Not Applicable                                 |                                                                                                                                                |
